# Supplementary material
Source: MDPI journal article supplement (https://www.mdpi.com/2076-3417/13/22/12422)
Supplement: s1 [file s1]

## SUPPLEMENTARY

### Integrated Earthquake Catalog III: Gakkel Ridge, Knipovich Ridge and Svalbard Archipelago

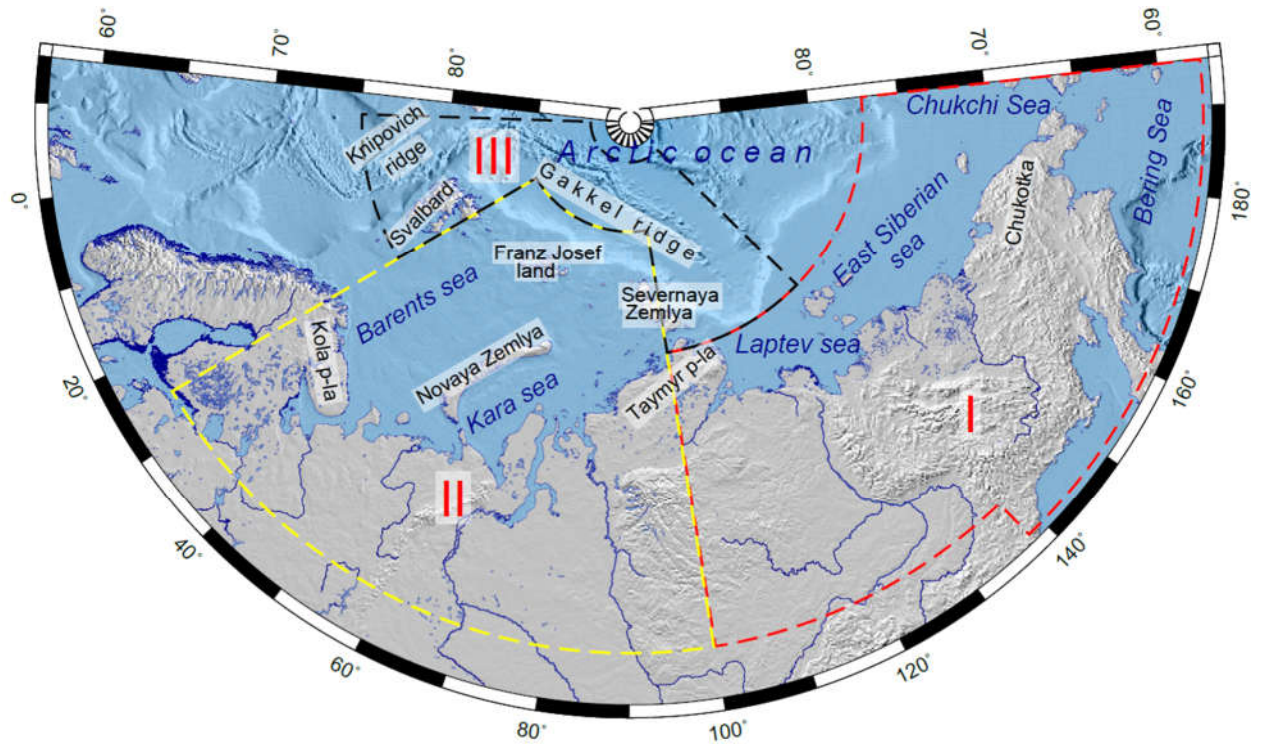

**Figure S1.** Schematic coverage map for catalogs I (Eastern Sector), II (Western Sector) and III (75°N, 10°W; 88°N, 10°W; 88°N, 140°E; 77°N, 140°E; 77°N, 100°E; 84°N, 100°E; 84°N, 25°E; 75°N, 25°E). It includes the Svalbard Archipelago and adjacent areas (75°N–84°N, 10°E–25°E), the Knipovich Ridge, Molloy and Spitsbergen fracture zones (75°N–83°N, 10°W–10°E), and the Gakkel Ridge (the rest of the studied area)

**Table S1.** Statistics of the ISC catalog.

| <b>Agency<br/>abbreviation</b> | <b>Agency</b>                                                                         | <b>With<br/>magnitude</b> |
|--------------------------------|---------------------------------------------------------------------------------------|---------------------------|
| BCIS                           | Bureau Central International de Sismologie, France                                    | 7                         |
| BER                            | University of Bergen, Norway                                                          | 10,075                    |
| CSEM                           | Centre Sismologique Euro-Méditerranéen (CSEM/EMSC), France                            | 548                       |
| DNK                            | Geological Survey of Denmark and Greenland, Denmark                                   | 888                       |
| EIDC                           | Experimental (GSETT3) International Data Center, U.S.A.                               | 47                        |
| FCIAR                          | Federal Center for Integrated Arctic Research, Russia                                 | 110                       |
| GFZ                            | Helmholtz Centre Potsdam GFZ German Research Centre For Geosciences, Germany          | 1                         |
| HEL                            | Institute of Seismology, University of Helsinki, Finland                              | 14                        |
| HFS                            | Hagfors Observatory, Sweden                                                           | 1                         |
| IDC                            | International Data Centre, CTBTO, Austria                                             | 217                       |
| IEPN                           | Institute of Environmental Problems of the North, Russian Academy of Sciences, Russia | 307                       |
| INMG                           | Instituto Português do Mar e da Atmosfera, I.P., Portugal                             | 1                         |
| ISC                            | International Seismological Centre, United Kingdom                                    | 3,419                     |
| ISS                            | International Seismological Summary, United Kingdom                                   | 5                         |
| MOS                            | Geophysical Survey of Russian Academy of Sciences (GS RAS), Russia                    | 3                         |
| KOLA                           | Kola Regional Seismic Centre, GS RAS, Russia                                          | 156                       |
| MSUGS                          | Michigan State University, Department of Geological Sciences, USA                     | 1                         |
| NAO                            | Stiftelsen NORSAR, Norway                                                             | 1,035                     |
| NEIC                           | National Earthquake Information Center, USA                                           | 85                        |
| OTT                            | Canadian Hazards Information Service, Natural Resources Canada                        | 8                         |
| SYKES                          | Sykes Catalogue of earthquakes 1950 onwards                                           | 2                         |
| WAR                            | Institute of Geophysics, Polish Academy of Sciences, Poland                           | 5                         |
| ZEMSU                          | USSR                                                                                  | 2                         |
| <b>TOTAL:</b>                  |                                                                                       | <b>16,937</b>             |

We check the hypothesis that small events recorded in Svalbard are ice-quakes, as proposed in [18,19]. We suppose ice-quakes must have focal depth smaller than 1km. The distribution of focal depth for earthquakes with magnitude  $M \leq 2.2$  (Figure S2) shows that more than 90% events are too deep to be ice-quakes.

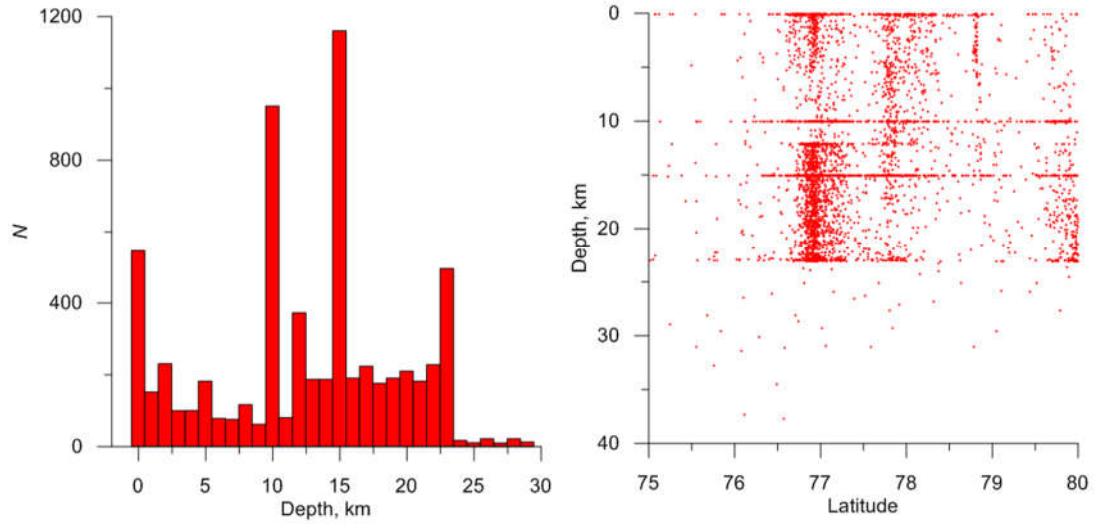

**Figure S2.** Distribution of focal depth for events with  $M \leq 2.2$  in Svalbard.

Before the merging process, each of the source catalogs (Table 1) was checked for internal duplicates. Statistical analysis did not reveal any anomalous groups of close events (Figure S3). It should be noted that duplicates typically have a metric value (1)  $Ro < 10$  [26,27]. The number of such close events within each catalog is small, and there are no statistical reasons to consider such events as duplicates. Analysis (Figure S5) was performed with metric parameters  $\sigma_T = 0.05 \text{ min}$ ,  $\sigma_X = \sigma_Y = 15 \text{ km}$ .

If there is a noticeable number of internal duplicates in the catalog, the distribution of the proximity function ( $Ro$  metric) between the nearest events has a characteristic bimodal shape with a minimum in the region of  $Ro = 10$ . For all source catalogues, there is no mode of metric distribution in small values. The number of close events with a metric value  $Ro < 10$  is very small, less than 0.5%. We do not consider these events to be duplicates because, due to natural clustering, earthquakes can occur very close in space and time.

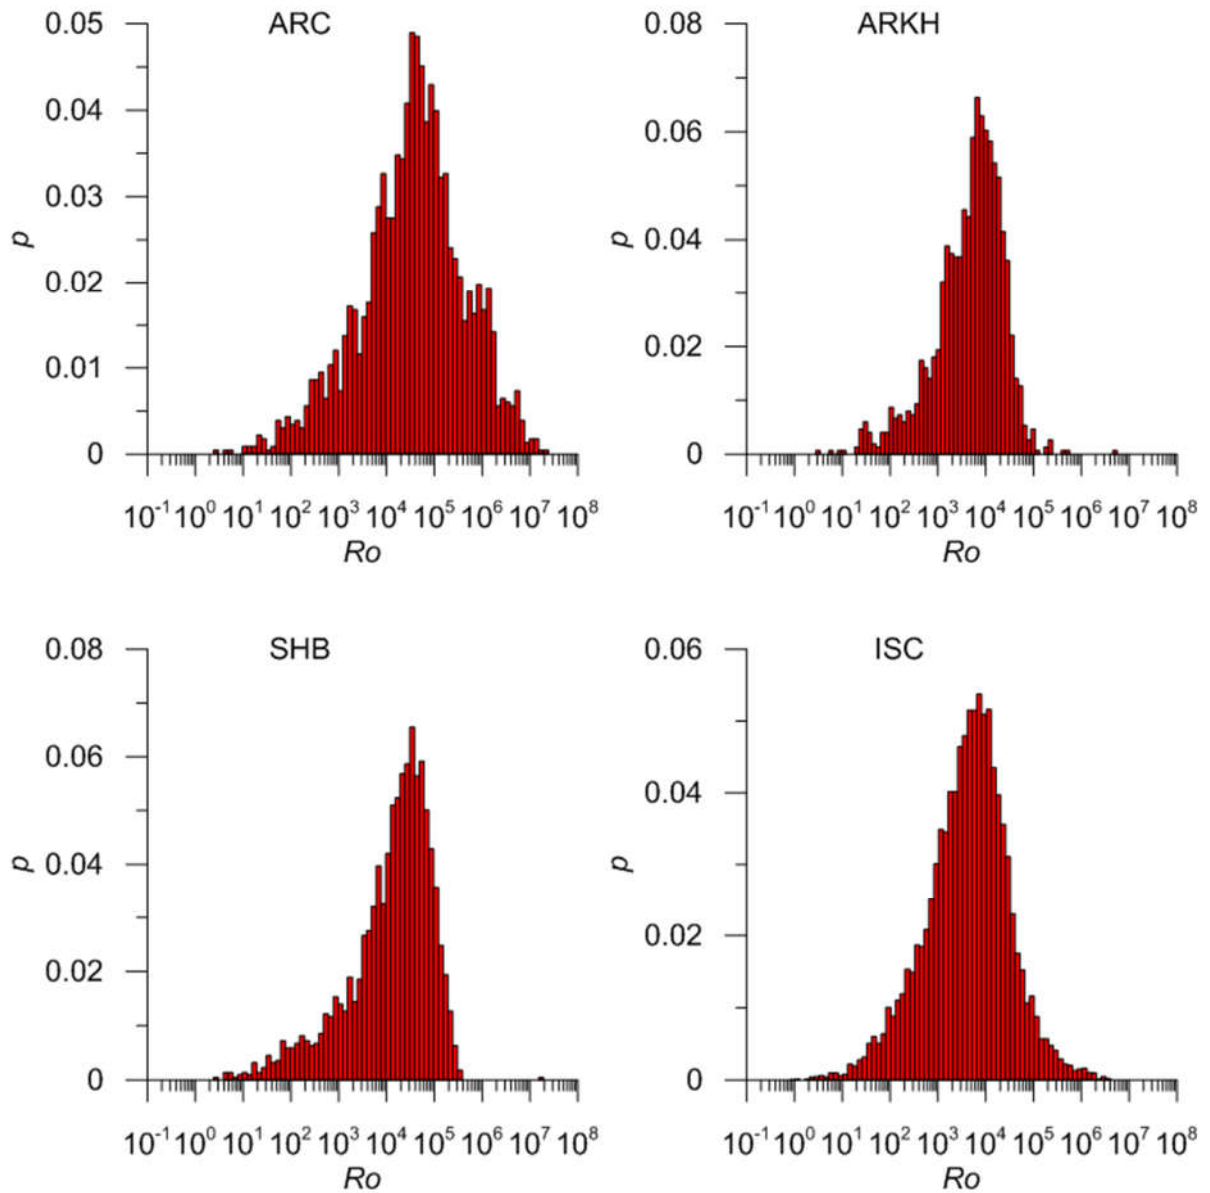

**Figure S3.** Distribution of the metric for events within the source earthquake catalogs (Table 1). The catalog name is indicated on the histogram.

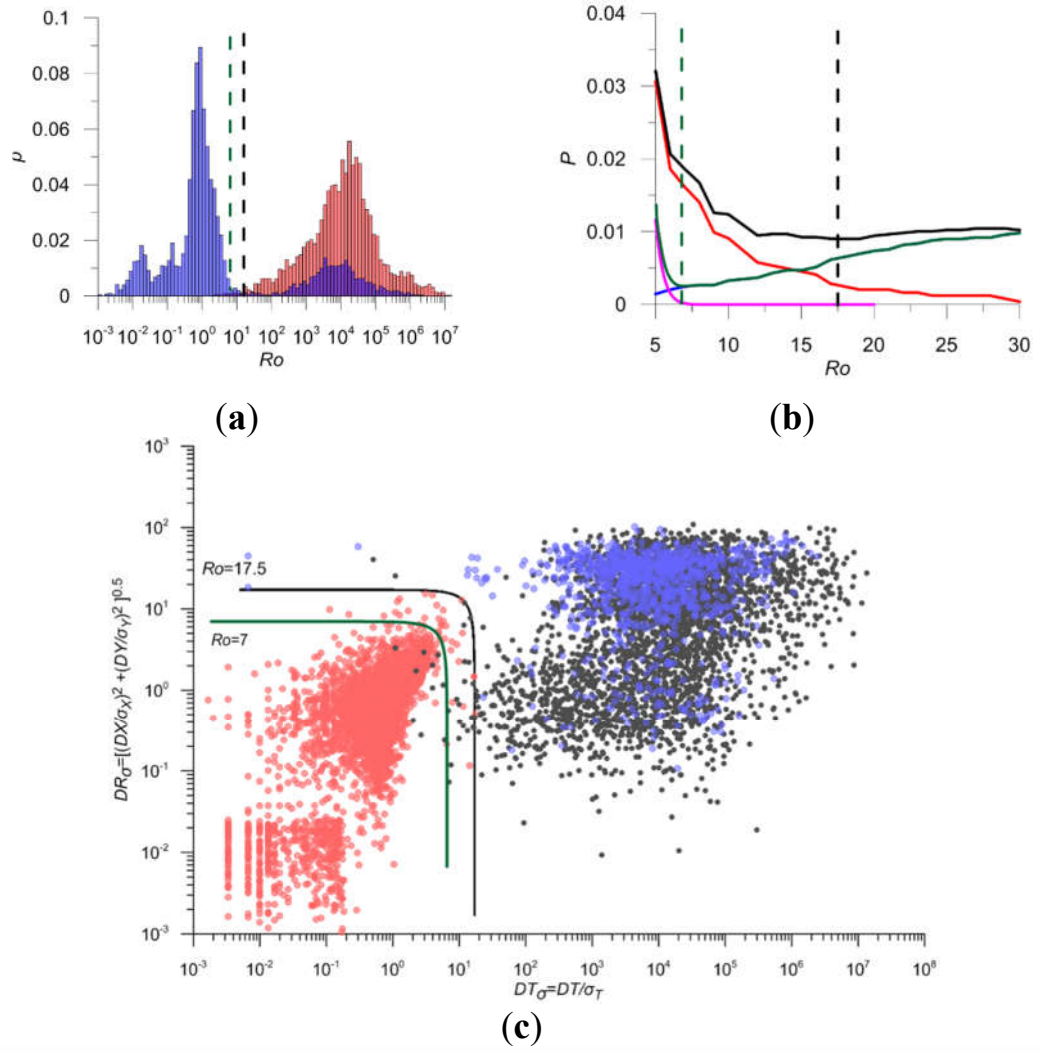

**Figure S4.** Modified Figure 9. Magenta line in (b) shows the probability of missing a duplicate in the model of multivariate normal distribution, green line shows the total probability of the first and the second kind errors. Dashed green line in (a) and (b) shows threshold value of  $Ro=7$ , minimizing total error. (c) Green contour line of the metric (1)  $Ro = 7$  shows obvious missing of duplicates.

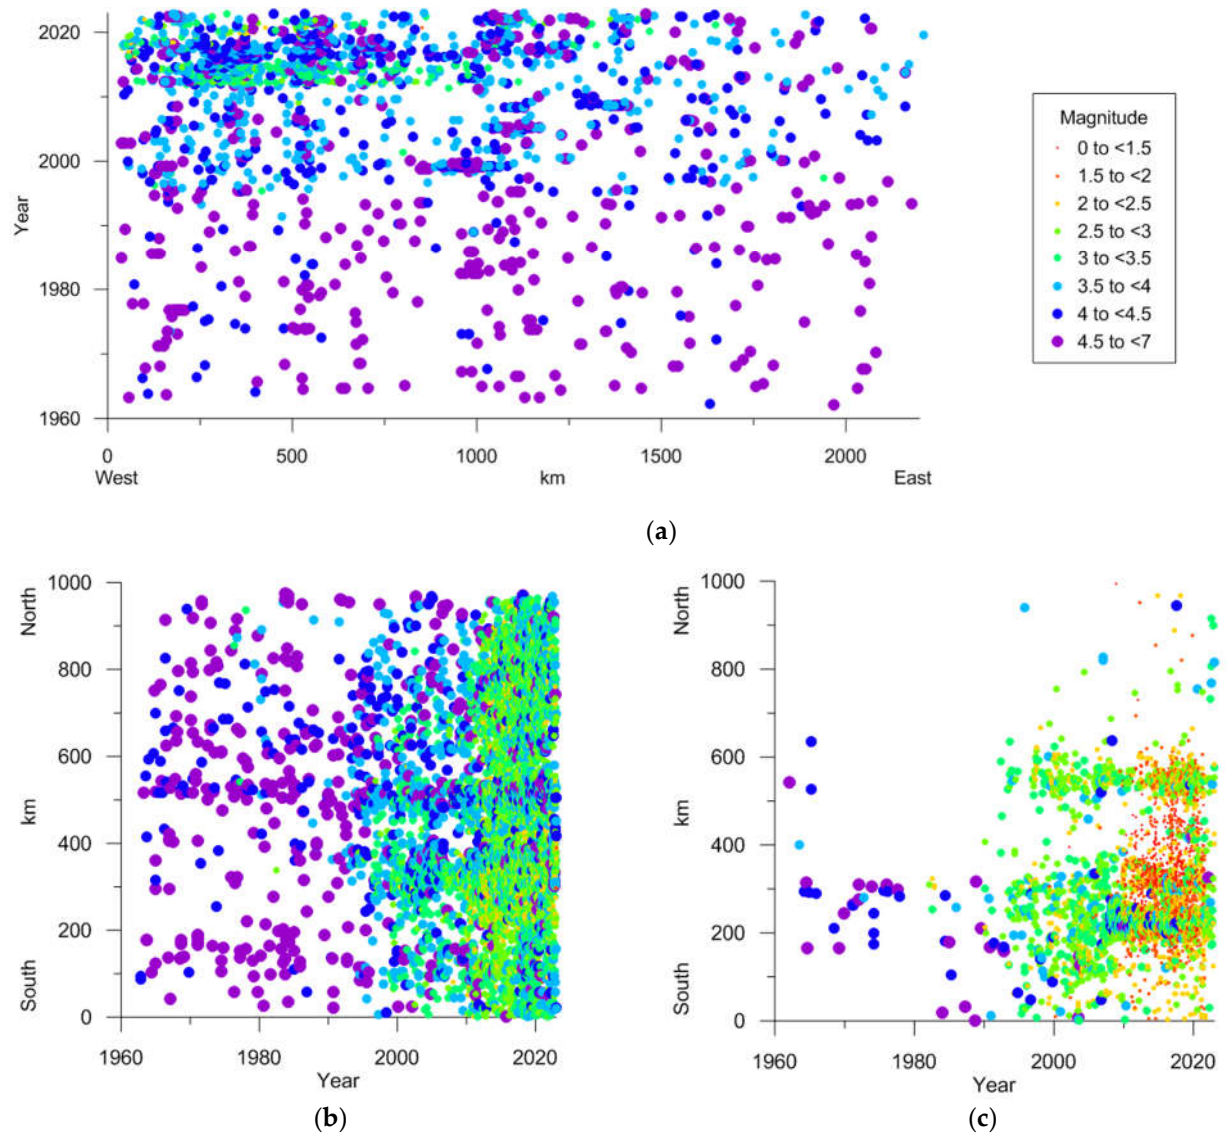

**Figure S5.** Distribution of earthquakes in space and time. **(a)** Gakkel ridge; **(b)** Knipovich ridge; **(c)** Svalbard.



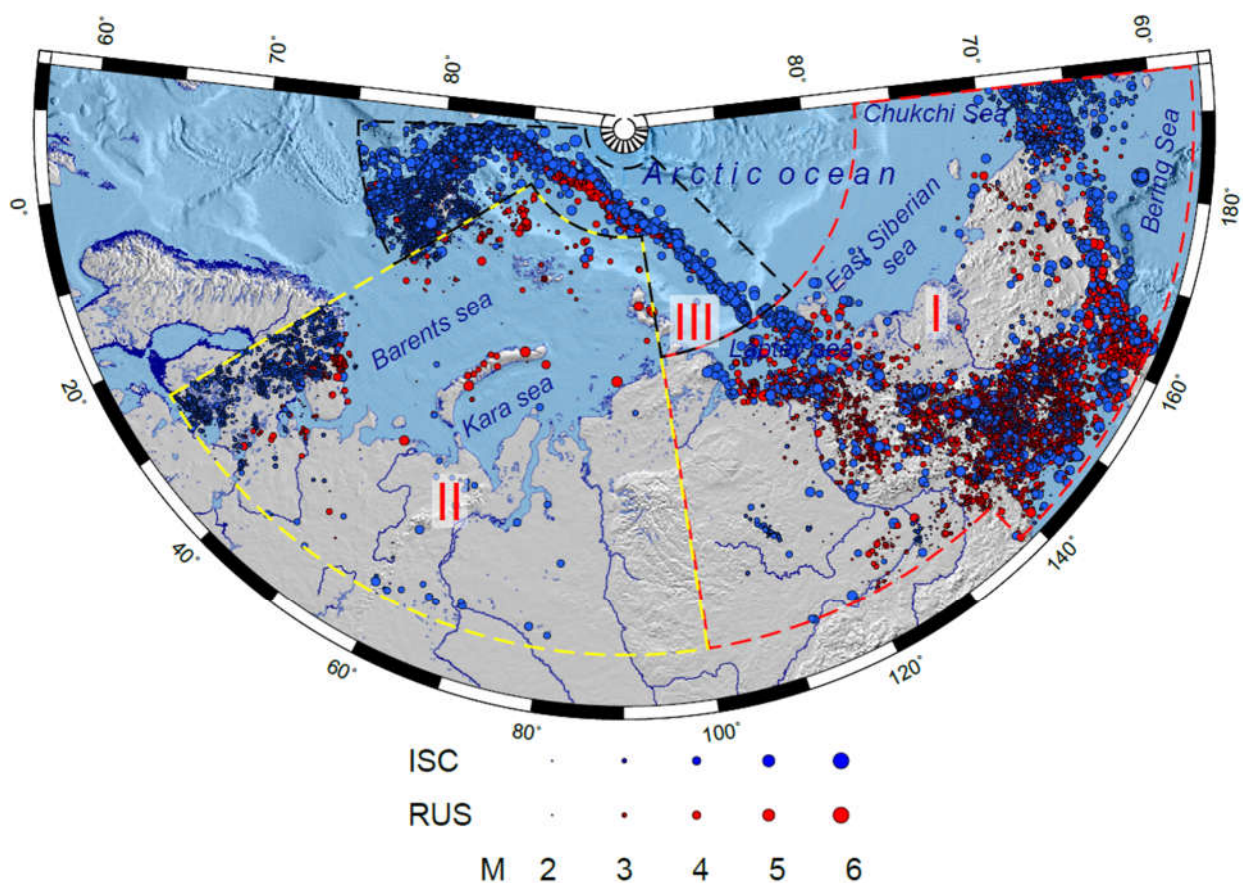

**Figure S6.** Map of earthquake epicenters of three created integrated catalogs: **I** (Eastern Sector), **II** (Western Sector) and **III** (Gakkel Ridge, Knipovich Ridge and Svalbard Archipelago).
